1 **L-tyrosine supplementation is not therapeutic for skeletal muscle dysfunction in**  
2 **zebrafish and mouse models of dominant skeletal muscle  $\alpha$ -actin nemaline**  
3 **myopathy.**

4

5 **Short title**

6 L-tyrosine treatment of NM models

7

8 **Authors**

9 Adriana M. Messineo<sup>1,2,#</sup>, Charlotte Gineste<sup>3,#</sup>, Tamar E. Sztal<sup>4,#</sup>, Elyshia L. McNamara<sup>1,2</sup>,  
10 Christophe Vilmen<sup>3</sup>, Augustin C. Ogier<sup>3</sup>, Dorothee Hahne<sup>5</sup>, David Bendahan<sup>3</sup>, Nigel G. Laing<sup>1,2</sup>,  
11 Robert J. Bryson-Richardson<sup>4,§</sup>, Julien Gondin<sup>6,§</sup>, Kristen J. Nowak<sup>2,7,8 §,\*</sup>

12

13 **Affiliations**

14 <sup>1</sup> Centre for Medical Research, The University of Western Australia, Western Australia, Australia.

15 <sup>2</sup> Harry Perkins Institute of Medical Research, Western Australia, Australia.

16 <sup>3</sup> Aix-Marseille University, CNRS, CRMBM, Marseille, France.

17 <sup>4</sup> School of Biological Sciences, Monash University, Melbourne, Australia.

18 <sup>5</sup> Centre for Microscopy, Characterisation and Analysis, The University of Western Australia,  
19 Western Australia, Australia.

20 <sup>6</sup> Institut NeuroMyoGène, UMR CNRS 5310 – INSERM U1217, Université Claude Bernard Lyon  
21 1, Villeurbanne, France.

22 <sup>7</sup> School of Biomedical Sciences, Faculty of Health and Medical Sciences, The University of  
23 Western Australia, Australia.

24 <sup>8</sup> Office of Population Health Genomics, Public Health Division, Western Australian Department of  
25 Health, East Perth, Western Australia, Australia.

26 # equal authorship contribution

27 § equal authorship contribution

28 \* Author for correspondence

29

30 **Corresponding Author**

31 Kristen Nowak, Office of Population Health Genomics, Public Health Division, Western Australian  
32 Department of Health, 192 Royal Street, East Perth, Western Australia, Australia.

33 kristen.nowak@health.wa.gov.au

34

35 **Key words**

36 nemaline myopathy, L-tyrosine, mouse, zebrafish, muscle, dietary supplementation.

37

38 **Summary statement**

39 Despite previous encouraging reports, this study utilising zebrafish and mouse models of nemaline  
40 myopathy shows no therapeutic benefit on skeletal muscle functionality in response to L-tyrosine  
41 supplementation.

42

43 **Abbreviations**

|    |                 |                                                   |
|----|-----------------|---------------------------------------------------|
| 44 | <i>ACTA1</i>    | skeletal muscle $\alpha$ -actin                   |
| 45 | <i>ACTA1-NM</i> | skeletal muscle $\alpha$ -actin nemaline myopathy |
| 46 | ANOVA           | analysis of variance                              |
| 47 | ATP             | adenosine triphosphate                            |
| 48 | CSA             | cross-sectional area                              |
| 49 | DA              | dopamine                                          |
| 50 | dpf             | days post fertilisation                           |
| 51 | hpf             | hours post fertilisation                          |
| 52 | FID             | free induction decays                             |
| 53 | LC-MS           | liquid chromatography-mass spectrometry           |
| 54 | MRS             | magnetic resonance spectroscopy                   |
| 55 | NE              | norepinephrine                                    |
| 56 | NM              | nemaline myopathy                                 |
| 57 | PCr             | phosphocreatine                                   |
| 58 | pH              | intracellular pH                                  |
| 59 | Pi              | inorganic phosphate                               |
| 60 | s.d.            | standard deviation                                |
| 61 | s.e.m.          | standard error of the mean                        |
| 62 | T               | Tesla                                             |
| 63 | WT              | wildtype                                          |

64

## 65 **ABSTRACT**

66 Nemaline myopathy (NM) is a skeletal muscle disorder with no curative treatment. Although L-  
67 tyrosine administration has been indicated to provide benefit to patients, previous studies have been  
68 limited due to sample size or not testing for raised L-tyrosine levels. We evaluated the efficacy of  
69 L-tyrosine treatment to improve skeletal muscle function in three animal models of NM caused by  
70 skeletal muscle  $\alpha$ -actin (*ACTA1*) mutations. Firstly we determined the maximum safest L-tyrosine  
71 concentration for inclusion in the water of wildtype zebrafish. We then treated NM Tg*ACTA1*<sup>D286G</sup>-  
72 *eGFP* zebrafish from 24 hours post fertilization with the highest safe L-tyrosine dose (10  $\mu$ M). At 6  
73 days post fertilization, no significant improvement was detected in skeletal muscle function  
74 (swimming distance). We also determined the highest safe L-tyrosine dose for dietary L-tyrosine  
75 supplementation to wildtype mice. Next we treated the NM Tg*ACTA1*<sup>D286G</sup> mouse model  
76 continuously from preconception with 2% L-tyrosine supplemented to regular feed. We examined  
77 skeletal muscles at 6–7 weeks using indicators of skeletal muscle integrity: bodyweight, voluntary  
78 running wheel and rotarod performance, all parameters previously shown to be reduced in  
79 Tg*ACTA1*<sup>D286G</sup> mice. The L-tyrosine treatment regime did not result in any improvement of these  
80 parameters, despite significant elevation of free L-tyrosine levels in sera (57%) and quadriceps  
81 muscle (45%) of treated Tg*ACTA1*<sup>D286G</sup> mice. Additionally, we assessed the effects of 4 weeks of  
82 2% L-tyrosine dietary supplementation on skeletal muscle function of older (6-7 month old) NM  
83 Tg*ACTA1*<sup>D286G</sup> and KI*Acta1*<sup>H40Y</sup> mice. This dosing regime did not improve decreased bodyweight,  
84 nor the mechanical properties, energy metabolism, or atrophy of skeletal muscles in these NM  
85 models. Together these findings demonstrate that with the treatment regimes and doses evaluated,  
86 L-tyrosine does not therapeutically modulate dysfunctional skeletal muscles in NM animal models  
87 with dominant *ACTA1* mutations. Therefore this study yields important information on aspects of  
88 the clinical utility of L-tyrosine for *ACTA1* NM.

89

## 90 **INTRODUCTION**

91 Tyrosine is a non-essential amino acid that serves as a precursor for several biologically  
92 active substances including the brain catecholamine neurotransmitters norepinephrine (NE) and  
93 dopamine. Tyrosine may be derived from the diet or via the enzymatic action of phenylalanine  
94 hydroxylase on phenylalanine present in the liver, leading to the production of L-tyrosine (the  
95 biologically active form of tyrosine; (Deijen et al., 1999). In humans, oral ingestion of L-tyrosine  
96 can improve stress-induced cognitive and behavioural deficits (Banderet and Lieberman, 1989;  
97 Deijen et al., 1999). Additionally, acute L-tyrosine ingestion is thought to enhance performance via  
98 improvements to aerobic power, cognitive performance, neurotransmitter synthesis, and stress

99 related exercise (Luckose et al., 2015). L-tyrosine treatment in rodents can reduce deficits in  
100 locomotor activity in old mice following cold water stress, alter stress-related changes in aggression  
101 in young mice (Brady et al., 1980), and can protect against both neurochemical and behavioural  
102 effects induced by various states of stress (Kabuki et al., 2009; Lehnert et al., 1984).

103 Dietary supplementation with L-tyrosine may have therapeutic application for patients with  
104 the skeletal muscle disorder nemaline myopathy (NM;(Kalita, 1989; Ryan et al., 2008; Wallgren-  
105 Pettersson and Laing, 2003). NM is a mainly congenital-onset disorder producing weakened  
106 skeletal muscles that contain the characteristic pathological features nemaline bodies (Shy et al.,  
107 1963). Twelve different genes can cause NM (Malfatti et al., 2015; Miyatake et al., 2017; Nowak et  
108 al., 2015), with a significant proportion of all NM-causing mutations being within the skeletal  
109 muscle  $\alpha$ -actin gene, *ACTA1* (Nowak et al., 2015). The majority of patients with *ACTA1*-NM have a  
110 severe phenotype leading to death within the first year of life (Nowak et al., 2013). At present, no  
111 curative treatment exists, highlighting the importance to thoroughly test plausible therapies and for  
112 potential novel therapeutic approaches to be identified and investigated.

113 Daily supplementation of L-tyrosine by an adult male and his 7-year-old son (both with  
114 NM) resulted in improved body strength (father), decreased pharyngeal secretions (son), and  
115 improved general stamina (both; (Kalita, 1989). After 10 days of L-tyrosine withdrawal, both  
116 patients reported reversion to previous clinical conditions, suggesting the improved conditions  
117 resulted from L-tyrosine administration (Kalita, 1989). A subsequent small trial contained 5  
118 genetically undefined NM patients (4 infants, 1 adolescent with childhood onset) receiving between  
119 250 to 3000 mg/d of powdered or capsule L-tyrosine for 2 to 5 months (Ryan et al., 2008). Within  
120 72 h on the L-tyrosine regime, all infants displayed initial improvements in “sialorrhoea, skeletal  
121 muscle strength and energy levels” (Ryan et al., 2008). Additionally, L-tyrosine (250 mg/d) from 3  
122 months of age was reported to produce marked reduction in oral secretions and improvement in  
123 skeletal muscle strength in a severely affected NM patient, however the patient died at 4 months  
124 with sudden cardiorespiratory failure (Olukman et al., 2013).

125 A murine model of NM due to an *Acta1* mutation (*KIActa1*<sup>H40Y</sup>) was orally dosed via  
126 syringe with L-tyrosine (25mg/d) for 4 weeks, from 4 weeks of age (Nguyen et al., 2011). This  
127 study concluded that L-tyrosine supplementation alleviated mobility deficits and skeletal muscle  
128 pathologies characteristic of *KIActa1*<sup>H40Y</sup> mice. However, the study did not address modulatory  
129 effects of the L-tyrosine dosing on the early lethality of male mice, nor did it report the sera or  
130 tissue levels of L-tyrosine.

131 Due to the limited, albeit promising data from the few patient studies and the single NM  
132 mouse model report, we aimed to comprehensively assess one aspect of the reported therapeutic  
133 benefit of dietary supplementation of L-tyrosine, skeletal muscle function. To do so, we chose three

134 dominant NM animal models, each with a missense *ACTA1* mutation resulting in an amino acid  
135 substitution (a mouse and a zebrafish model with p.D286G; a mouse model with p.H40Y). In  
136 addition to each of these models being suitable animal models of *ACTA1*-NM, they also have  
137 characterised deficits in skeletal muscle function ideal for robust assessment of any improvement  
138 due to L-tyrosine. Initially, we evaluated different levels of L-tyrosine supplementation in wildtype  
139 (WT) zebrafish and mice to identify the highest safe L-tyrosine concentration to dose our NM  
140 models. We determined L-tyrosine levels in sera and skeletal muscles of treated mice using this  
141 dose, to ensure this supplementation resulted in a significant L-tyrosine increase in the relevant  
142 tissues. We tested different L-tyrosine treatment regimes on the dominant *ACTA1*-NM zebrafish  
143 and mouse models, and evaluated potential effects on skeletal muscle function using physiological  
144 assays and parameters of voluntary exercise.

145

## 146 **RESULTS**

147

### 148 **L-tyrosine treatment at higher concentrations can result in deleterious side effects in wildtype** 149 **zebrafish**

150 A pilot range-finding experiment with WT zebrafish was performed to determine the maximal non-  
151 toxic L-tyrosine dose for treatment. Concentrations ranged from 0.1  $\mu$ M to 10 mM and the survival,  
152 heart rate and locomotion of the zebrafish were recorded. Whilst there was a trend between  
153 decreasing concentrations of L-tyrosine and resting heart rate, we observed a significant increase in  
154 resting heart rate for zebrafish treated with 0.1  $\mu$ M and 1  $\mu$ M, suggesting that L-tyrosine is eliciting  
155 a biological effect in the fish. The experimental dose for L-tyrosine treatment was determined at 10  
156  $\mu$ M since zebrafish treated with higher concentrations showed significantly reduced survival and  
157 swimming performance compared to water treated controls (**Fig. 1**).

158

### 159 **L-tyrosine addition does not improve the swimming performance of *TgACTA1<sup>D286G</sup>-eGFP*** 160 **zebrafish**

161 *TgACTA1<sup>D286G</sup>-eGFP* zebrafish and their WT siblings (not carrying the *ACTA1<sup>D286G</sup>-eGFP*  
162 cassette) were maintained from 1 day post fertilisation (dpf) in E3 media treated with either 10  $\mu$ M  
163 L-tyrosine or H<sub>2</sub>O until 6 dpf when their swimming performance was assessed. As expected, a  
164 significant reduction in distance travelled was observed in water treated *TgACTA1<sup>D286G</sup>-eGFP* fish  
165 compared to control WT siblings (*TgACTA1<sup>D286G</sup>-eGFP*=0.861 $\pm$ 0.021 n=112; WT  
166 siblings=1.00 $\pm$ 0.073, n=127,  $p < 0.01$ ). This deficit in swimming distance in *TgACTA1<sup>D286G</sup>-eGFP*  
167 zebrafish was not ameliorated by the L-tyrosine treatment (water treated=0.861 $\pm$ 0.021, n=112;  
168 tyrosine treated=0.831 $\pm$ 0.082, n=126; **Fig. 2**).

169

170 **Wildtype mice receiving 4% and 8% L-tyrosine supplemented diets after birth display**  
171 **deleterious side effects, whereas mice receiving a 2% L-tyrosine supplemented diet from pre-**  
172 **conception do not**

173 A safety dosing study for L-tyrosine (0, 2, 4 or 8%) supplemented to normal mouse feed (normally  
174 0.7% L-tyrosine) was performed with WT (FVB/NJArc) mice. We observed deleterious outcomes  
175 for mice maintained on both the 4% and 8% L-tyrosine supplemented diets. For mice eating the 8%  
176 supplemented feed, one dam lost her entire first litter (not necessarily abnormal) then took longer  
177 than usual to again become pregnant. She successfully produced a litter of 6 pups, however when  
178 the pups were >1 week of age, they were all found dead, a finding out of the ordinary. The second  
179 dam receiving the 8% L-tyrosine supplemented feed produced her first and only litter with 2 pups.  
180 These pups appeared smaller than usual at the time of wean and were therefore given soft feed  
181 located at the base of the cage. Shortly after wean one of the pups was observed to not be moving  
182 despite breathing normally and appearing well at an early check that same day. He was therefore  
183 sacrificed. Both pups were determined to be ~50% of the weight of WT mice fed the standard diet.

184 A total of 30 pups were born to the dams receiving the 4% L-tyrosine supplemented feed.  
185 Many of these pups, and their mothers, appeared generally dishevelled with ruffled fur. Most pups  
186 were found missing on postnatal day 17 (presumably died and were then eaten by the dams or their  
187 siblings) with only 6 pups surviving beyond this age (80% mortality). The surviving mice had  
188 decreased bodyweight compared to age-matched mice on the control diet (4% L=tyrosine,  
189  $11.5 \pm 1.7\text{g}$ ,  $n=6$ ; control diet,  $15.4 \pm 1.4\text{g}$ ,  $n=9$ ,  $p=0.0004$ ).

190 Due to the animal welfare concerns surrounding these findings, the 4% and 8% L-tyrosine  
191 supplemented diets were not further pursued. No detrimental side effects were overtly noticeable for  
192 the dams with the 2% L-tyrosine supplemented diet or their resulting offspring ( $n=17$ ), with all pups  
193 surviving beyond wean age and appearing by eye to be similar to those born to mice on the regular  
194 diet. Therefore this dose was subsequently evaluated for therapeutic benefit in the two NM mouse  
195 models, with the dosing regime being either from pre-conception or commencing at 5 to 6 months  
196 of age. Our measurements of average daily feed consumption in adult NM mice indicated that mice  
197 continued to eat the same amount of feed once receiving the L-tyrosine supplementation as there  
198 was no change in the weight of feed consumed during the 4 week exposure to the 2% L-tyrosine  
199 supplemented diet relative to when mice were receiving the normal diet (~3 g/day and ~4.5 g/day  
200 consumed for the *KIAct1*<sup>H40Y</sup> and the *TgACTA1*<sup>D286G</sup> mice respectively).

201

202 **Normal feed supplemented with 2% L-tyrosine significantly elevates levels of L-tyrosine in**  
203 **sera and skeletal muscle of *TgACTA1*<sup>D286G</sup> mice**

204 We assayed samples from  $TgACTAI^{D286G}$  mice receiving the 2% L-tyrosine supplemented feed  
205 compared to untreated mice on the control diet and determined that the freely detectable levels of L-  
206 tyrosine were significantly elevated in both the sera (untreated mice=52.7±7.8 nmol/ml, treated  
207 mice=83.0±13.9 nmol/ml,  $p < 0.01$ ) and quadriceps femoris muscle (untreated mice = 0.089±0.021  
208 nmol/mg, treated mice = 0.129±0.032 nmol/mg,  $p < 0.05$ ; **Fig. 3**).

209

### 210 **Total bodyweight and hindlimb skeletal muscle volume are not increased in L-tyrosine** 211 **treated ACTAI-NM mice**

212 At 6 weeks of age there was no improvement in overall bodyweight of male or female  
213  $TgACTAI^{D286G}$  mice treated from pre-conception (**Fig. 4A**). To the contrary, a significant decrease  
214 in total bodyweight was detected in L-tyrosine treated male mice compared to untreated  
215  $TgACTAI^{D286G}$  mice (**Fig. 4A**). Likewise, reduced total bodyweight was not negated at 6-7 months  
216 for  $ACTAI$ -NM mice from either mouse model treated for 1 month ( $TgACTAI^{D286G}$   
217 treated=32.8±4.4g; untreated=34.6±2.7g and  $KIActAI^{H40Y}$  treated=22.6±1.7g; untreated=23.8±2.4g;  
218 **Fig. 4B**). Additionally, at this older age the hindlimb muscle volume was not different between  
219 treated and untreated mice for both models (**Fig. 4C**).

220

### 221 **L-tyrosine treatment does not improve the voluntary running wheel or rotarod performance** 222 **of $TgACTAI^{D286G}$ mice**

223 As per Ravenscroft *et al.*, (2011), the voluntary running wheel and rotarod performances of  
224  $TgACTAI^{D286G}$  mice are impaired compared to WT mice.  $TgACTAI^{D286G}$  mice treated from prior to  
225 conception did not exhibit any significant improvement for any voluntary running wheel activity  
226 parameters relative to untreated mice of the same sex (**Fig. 5**). Similarly, none of the rotarod  
227 measurements were significantly improved for treated versus untreated male  $TgACTAI^{D286G}$  mice  
228 (**Fig. 6**).

229

### 230 **Mechanical performance and metabolism of skeletal muscles in $TgACTAI^{D286G}$ and** 231 **$KIActAI^{H40Y}$ mice is not increased by L-tyrosine treatment**

232 Absolute maximal force at 6-7 months of age was unchanged for the two NM mouse models after 1  
233 month of treatment (**Fig. 7A & 7B**). Force production during the fatiguing protocol was comparable  
234 for the treated and untreated mice for each model (**Fig. 7C & 7D**). Consequently, the fatigue index  
235 ( $TgACTAI^{D286G}$  treated=0.22±0.07; untreated=0.22±0.08 and  $KIActAI^{H40Y}$  treated=0.35±0.13;  
236 untreated=0.38±0.11) and measures of resting energy metabolism ([PCr] and  $pH_i$ ; **Fig. 8**) were  
237 similar for both treatment groups for each model. During exercise, PCr consumption, Pi production



238 (data not shown) and pH variations were also similar between the treated and untreated mice for  
239 each model (**Fig. 8A**).

240

## 241 **DISCUSSION**

242

243 Prior reports of L-tyrosine supplementation to NM patients describe potential positive effects of  
244 improved skeletal muscle strength, decreased pharyngeal/oral secretions, and increased  
245 stamina/energy levels (Kalita, 1989; Ryan et al., 2008; Olukman et al., 2013), but lacked sufficient  
246 numbers for statistical evaluation. The purpose of this study was to evaluate the therapeutic  
247 usefulness of L-tyrosine supplementation on one of these previously reported potential benefits,  
248 skeletal muscle function, using three dominant *ACTA1*-NM animal models and multiple measures.  
249 We utilised one zebrafish (*TgACTA1<sup>D286G</sup>-eGFP*) and two mouse (*TgACTA1<sup>D286G</sup>* and  
250 *KIACTA1<sup>H40Y</sup>*) models, encompassing all known laboratory animal models of dominant *ACTA1*-  
251 NM. There are a very small number of patients (usually only one individual) with a particular  
252 mutation in any of the twelve NM genes, including nebulin and actin, the two most common NM  
253 genes. Therefore animal models provide a means to thoroughly investigate a possible therapeutic in  
254 multiple individuals with the same genetic composition.

255 We first investigated the safety of increased L-tyrosine levels for WT zebrafish and  
256 determined that higher concentrations of L-tyrosine significantly reduced survival and swimming  
257 performance. These findings suggest that the potential toxicity of high L-tyrosine dosing should be  
258 considered for humans supplementing with this amino acid, for whatever therapeutic reason. For the  
259 zebrafish aspect of our study, we utilised the highest concentration of L-tyrosine that did not  
260 produce these negative outcomes (10  $\mu$ M). Nevertheless, the L-tyrosine treated wildtype and  
261 *TgACTA1<sup>D286G</sup>-eGFP* zebrafish did not exhibit any improvement in the swimming distance  
262 travelled.

263 We also supplemented regular mouse feed with 3 levels of L-tyrosine to determine the  
264 highest safe dose. Supplementation with both 4% and 8% L-tyrosine was associated with  
265 deleterious side effects in WT mouse mothers as well as their pups, when the feed was  
266 supplemented from pre-conception. Our pilot toxicity study in mice was not exhaustive or  
267 extensive, yet resulted in high mortality rates for two conditions. These adverse findings with the  
268 4% and 8% doses, especially in combination with the findings from the zebrafish toxicity analysis,  
269 provide sufficient reason to highlight possible caution for humans receiving high doses of L-  
270 tyrosine.



271 Tyrosine related toxicity, deleterious effects and weight loss has been previously reported in  
272 the literature, e.g. Boctor and Harper, 1968. A potential explanation for the deleterious effects  
273 observed in mice receiving higher doses of L-tyrosine may be due to L-tyrosine being a precursor  
274 for brain catecholamines. Previous mouse studies report direct correlations between aggressive  
275 activity and brain catecholamines in mice (Thurmond and Brown, 1984) with the effects proposed  
276 due to the prevention of NE depletion (Deijen et al., 1999). Aggressive behaviour, defined by the  
277 number of territorial-induced attacks, was reported in previously unstressed rodents receiving a diet  
278 supplemented with 4% L-tyrosine when they were later put under stress (Brady et al., 1980). The  
279 authors postulated a reciprocal relationship between dopamine (DA) and NE plus serotonin for the  
280 facilitation of aggressive behaviour and suggested that aggressive behaviour may be related to  
281 lower brain NE and serotonin levels relative to DA (Brady et al., 1980). Aggression by the mother  
282 may have been the cause of death for some of the mouse pups on the 4% and 8% supplemented  
283 doses in our study.

284 As no overtly deleterious side effects were seen with 2% L-tyrosine dietary  
285 supplementation, the 2% L-tyrosine supplementation dose was pursued for the efficacy studies with  
286 the *ACTA1*-NM mouse models. The 2% L-tyrosine dose significantly increased the free L-tyrosine  
287 levels in sera (>55%) and quadriceps muscle (45%) of treated mice. Other studies determined serum  
288 tyrosine levels in rats receiving either a 2% or 5% casein diet for 14 days (of  $40\pm 3$  nmol/ml and  
289  $86\pm 8$  nmol/ml respectively (Fernstrom and Fernstrom, 1995). The level of sera L-tyrosine detected  
290 in untreated *TgACTA1<sup>D286G</sup>* mice ( $52.7\pm 7.8$  nmol/ml) in this study is in accordance with these  
291 previous reports. A paucity of data exists for free L-tyrosine levels in rodent skeletal muscles,  
292 although baseline levels of L-tyrosine in other tissues (retina, 0.25 nmol/mg; hypothalamus, 0.55  
293 nmol/mg) have been established for rats (Fernstrom and Fernstrom, 1995). The mean value for L-  
294 tyrosine in quadriceps muscle of untreated mice we determined ( $0.089\pm 0.021$  nmol.mg<sup>-1</sup>) was less  
295 than these levels.

296 We performed a two-pronged investigation with the 2% L-tyrosine supplemented feed and  
297 the NM mouse models, to evaluate pre-birth versus later-onset treatment. We reasoned that if the  
298 pre-birth experimental arm established breeding mice on the diet fortified with the highest safe L-  
299 tyrosine level and continued the diet through the postnatal and post-wean periods, all offspring  
300 conceived would receive the greatest dose and duration of L-tyrosine exposure. Amino acids are  
301 known to cross the epithelium of the placental barrier by active transport via specific transporters in  
302 syncytiotrophoblast plasma membranes (Jansson, 2001), and are readily detectable in murine breast  
303 milk (Rassin et al., 1978). Therefore this L-tyrosine regime would presumably provide the best  
304 possible opportunity for prevention/improvement of the skeletal muscle phenotypes attributed to  
305 their NM disease if L-tyrosine were therapeutic for this parameter. A well-known example whereby

306 taking supplements prenatally/throughout gestation has significant therapeutic effects is folic acid in  
307 the prevention of neural tube defects such as spina bifida (Group, 1991). *TgACTA1*<sup>D286G</sup> mice  
308 treated with the pre-birth 2% L-tyrosine supplementation regime until 7 weeks of age demonstrated  
309 no improvement in body weight (in fact, L-tyrosine treated 7 week old male *TgACTA1*<sup>D286G</sup> mice  
310 weigh significantly less than untreated males), voluntary exercise and rotarod capacity deficits  
311 previously reported for this NM model (Ravenscroft et al., 2011).

312 Our second experimental arm with the murine NM models assessed a dosing regime that  
313 started in older mice at 5 to 6 months of age and continued for one month. This is the same  
314 treatment duration that Nguyen et al. previously reported for the successful treatment of  
315 *KIActa1*<sup>H40Y</sup> mice (Nguyen et al., 2011). However, unlike Nguyen et al., we did not detect  
316 significant improvements in any phenotype we measured in response to dietary treatment with 2%  
317 L-tyrosine for the *KIActa1*<sup>H40Y</sup> or the *TgACTA1*<sup>D286G</sup> models. A potential factor that may account  
318 for the discrepancies between our findings compared to the previous Nguyen et al. study is the  
319 method of delivery and the dose of L-tyrosine. The *KIActa1*<sup>H40Y</sup> mice in the Nguyen et al. study  
320 were given 25 mg/d of L-tyrosine resuspended in water orally. However as the Nguyen et al. study  
321 did not report L-tyrosine levels in sera or skeletal muscles from treated mice we are not able to  
322 provide a direct comparison as to the efficiency of the two dosing routes. Thus to relate the dose of  
323 L-tyrosine that mice were exposed to in this study to the dose in the previous study, we calculated  
324 that mice consuming the 2% L-tyrosine supplemented feed would have received a dose ranging  
325 from ~60-90 mg/d (based on the daily intake of 3-4.5 g/d for adult *ACTA1*-NM mice that we  
326 determined, which fits with the published murine average daily food consumption range of  
327 adolescent mice being from 3.1–6.3 g/d, Bachmanov et al., 2002). Moreover, if we normalise this  
328 dose intake to body weight using the average weight for young mice (12g) treated since pre-  
329 conception in addition to the older mice (35g) that were treated at 6 months, this equates to 0.5 -  
330 0.75% and 0.17 - 0.25% of total bodyweight for young and older mice respectively. Nguyen et al.  
331 reported a similar dose intake of 0.16% of total bodyweight (based on an average weight of 15 g  
332 and mice receiving 25 mg/d).

333 In conclusion, we determined safe concentrations of L-tyrosine for dosing WT zebrafish  
334 (water) and mice (dietary supplementation), noting higher concentrations had deleterious effects.  
335 The dose evaluated in the dominant *ACTA1*-NM mouse models significantly increased the free L-  
336 tyrosine levels in the sera and quadriceps of *TgACTA1*<sup>D286G</sup> mice. Nevertheless, the maximal safe  
337 doses utilised had no positive effect on a range of skeletal muscle parameters for *TgACTA1*<sup>D286G</sup>-  
338 *eGFP* zebrafish when added from 24 hpf, nor for the *ACTA1*-NM mice when added continuously  
339 from pre-conception (*TgACTA1*<sup>D286G</sup>), or for one month from 5 to 6 months of age (*TgACTA1*<sup>D286G</sup>

340 and *KIActa1<sup>H40Y</sup>*). The amassed data from our multi-pronged evaluation study demonstrate that  
341 supplementation of L-tyrosine using the regimes we trialled did not have therapeutic impact on  
342 skeletal muscle function in *ACTA1*-NM animal models. Nevertheless, our study does not exclude  
343 the potential that L-tyrosine dosing can (i) reduce other symptoms (such as oral secretions and the  
344 ability to swallow) that might provide patient benefit, and (ii) have benefit for other genetic causes  
345 of NM. However, our findings highlight the imperative to further pursue novel therapies for  
346 *ACTA1*-NM.

347

## 348 **Materials and Methods**

### 349 **Animal ethics statement**

350 All animal experiments were performed in agreement with the guidelines of the respective countries  
351 (National Health and Medical Research Council of Australia, French guidelines for animal care,  
352 European convention for the protection of vertebrate animals used for experimental purposes, and  
353 institutional guidelines). Institutional approval was granted from the respective animal ethics  
354 committees (Animal Resources Centre, Monash University, Aix-Marseille University).

355

### 356 **Zebrafish NM model, Tg*ACTA1*<sup>D286G</sup>-*eGFP***

357 Zebrafish were maintained according to standard protocols (Westerfield, 2007). Zebrafish strains  
358 used were Tg( $\beta$ Act:loxP-*mCherry*-pA-loxP:Hs.*ACTA1*<sup>D286G</sup>-*eGFP*) and Tg(*Actc1b*:iCre; (Sztal et  
359 al., 2015). Crossing of these strains results in the Tg( $\beta$ Act:loxP-*mCherry*pA-loxP:Hs.*ACTA1*<sup>D286G</sup>-  
360 *eGFP*) strain, shortened to Tg*ACTA1*<sup>D286G</sup>-*eGFP*.

361

### 362 **L-tyrosine dosing of the zebrafish NM model**

363 For toxicology testing, 30 WT Tübingen zebrafish were placed in E3 embryo media and treated  
364 with increasing doses from 0.1  $\mu$ M to 10 mM of L-tyrosine disodium salt hydrate (T1145, Sigma,  
365 Australia) dissolved in H<sub>2</sub>O. Zebrafish were treated from 24 hpf until 6 dpf. Supplemented embryo  
366 media was made fresh and changed daily. Zebrafish were monitored for survival and heart rate as  
367 indicators of toxicity. For controls, H<sub>2</sub>O was added to the embryo media instead of L-tyrosine. Four  
368 independent treatments were performed for each experiment with 30 fish per treatment.

369

### 370 **Zebrafish swimming assays and resting heart rate determination**

371 The resting heart rates were measured at 2 dpf by counting the number of heart beats in 10 sec.  
372 Heart rate measurements were performed in triplicate with 10 fish per experiment. Assay of  
373 swimming ability, as well as the subsequent data analyses performed on 6 dpf wild type zebrafish

374 treated with increasing doses of L-tyrosine, *TgACTAI*<sup>D286G</sup>-*eGFP* and their control WT siblings  
375 treated with 10  $\mu$ M L-tyrosine were as per (Sztal et al., 2016). Total voluntary distance travelled in  
376 a 10-minute period in the dark was measured in mm using zebraboxes (Viewpoint Life Sciences).  
377 The values for each genotype and treatment were then normalised to the average of the wildtype  
378 untreated siblings in the same replicate. For swimming assays on wild type zebrafish, four  
379 independent treatments were performed per experiment with 24 fish per treatment. For swimming  
380 assays on *TgACTAI*<sup>D286G</sup>-*eGFP* and their control WT sibling, five independent treatments were  
381 performed per experiment with 16-39 fish per treatment (238 *TgACTAI*<sup>D286G</sup>-*eGFP* fish in total).  
382 Based on the pooled SD of the tyrosine and water treated *TgACTAI*<sup>D286G</sup>-*eGFP* fish this gave us 0.8  
383 power at 0.05 significance to detect an improvement of 52%. For heart rate and swimming assays  
384 all treatments were blinded and randomized to avoid experimental bias. Once the testing and  
385 analyses were completed the treatments groups were revealed.

386

### 387 **Mouse NM models *TgACTAI*<sup>D286G</sup> and *KIActAI*<sup>H40Y</sup> and control mouse lines**

388 The *TgACTAI*<sup>D286G/+</sup> (Ravenscroft et al., 2011); abbreviated to *TgACTAI*<sup>D286G</sup> and *KIActAI*<sup>H40Y/+</sup>  
389 (Nguyen et al., 2011); abbreviated to *KIActAI*<sup>H40Y</sup> lines were the NM models used in this study. WT  
390 mouse strains were used for the initial L-tyrosine safety dosing study (FVB/NJArc), and as a  
391 statistical comparison for the *TgACTAI*<sup>D286G</sup> line (C57BL/6J; the closest background strain).

392

### 393 **Dietary L-tyrosine dosing of the NM mouse models**

394 Mouse feed (Speciality Feeds, Glen Forrest, Australia, basal L-tyrosine level of 0.7%; SAFE, Augy,  
395 France; basal L-tyrosine level of 0.45%) contained all nutritional dietary parameters either meeting  
396 or exceeding the maintenance guidelines for rats and mice outlined by the National Research  
397 Council (US; (Animals, 2011). Prior to evaluating the efficacy of L-tyrosine treatment, we  
398 conducted a pilot study with normal mice to compare the Australian standard feed (containing 0.7%  
399 L-tyrosine) to the same feed supplemented with an additional 2%, 4% or 8% L-tyrosine. Breeding  
400 pairs were established on their respective *ad libitum* diets so that all offspring mice were conceived  
401 and maintained on these until they were sacrificed at ~7 weeks of age.

402 Once the 2% L-tyrosine supplemented feed was established as the highest safe concentration  
403 of those tested, two dosing regimes were evaluated for their modulation of skeletal muscle disease  
404 phenotype. One regime commenced from pre-conception (e.g. dosing of breeding pairs) and  
405 continued until sacrifice at 7 weeks of age (*TgACTAI*<sup>D286G</sup> mice: regular ‘untreated’ feed, n=14  
406 males, 17 females; 2% L-tyrosine supplemented ‘treated’ feed, n=10 males, 12 females). The other  
407 regime commenced when mice were 5 to 6 months of age and continued for 4 weeks upon which

408 mice were tested (*TgACTAI*<sup>D286G</sup> male mice: treated, n=7; untreated, n=8; *KIActal*<sup>H40Y</sup> female  
409 mice: treated, n=13; untreated, n=13). Average weekly feed intake per cage was determined by  
410 weighing feed each week for 3 or more weeks prior to addition of the L-tyrosine supplemented feed  
411 and then for every week during the 4-week exposure to the treatment. An average daily weight of  
412 feed consumed per mouse was then calculated.

413

#### 414 **Quantification of L-tyrosine levels in plasma and skeletal muscles of NM mouse models**

415 Blood was collected from L-tyrosine treated and non-treated mice via cardiac puncture at  
416 euthanasia at ~7 weeks of age. Immediately afterwards, quadriceps femoris muscles were excised,  
417 snap frozen in liquid nitrogen and stored at -80°C. The free L-tyrosine concentration was  
418 determined using liquid chromatography/mass spectrometry (LC/MS; University of Western  
419 Australia, Centre for Metabolomics, Perth, Australia). Quadriceps femoris samples were thawed  
420 from storage at -80°C and weighed prior to being homogenised with ceramic beads in 500 µl of 0.2  
421 M perchloric acid (Hamasu et al., 2009). Sample clean up and derivatization was performed on 100  
422 µl of either muscle lysate or sera using an EZfaast™ Kit (Phenomenex). Then 0.1 µl of sample was  
423 applied to an Agilent 1290 UPLC coupled to a 6560 QQQ for the measurement of free L-tyrosine.  
424 The EZ:faast AAA-MS 4 µ column 250 x 2.0 mm provided with the kit was used and the  
425 acquisition method of the kit was followed. The internal standard was homophenylalanine. Data  
426 were acquired in positive ion mode and the transition for L-tyrosine was 396-136.

427

#### 428 **Bodyweight of NM mouse models**

429 Male 6-week old *TgACTAI*<sup>D286G</sup> mice treated from pre-conception were weighed prior to  
430 individually being housed with access to Low-Profile Wireless Running Wheels (Med Associates  
431 Inc, USA) for 6 consecutive days. For both *TgACTAI*<sup>D286G</sup> and *KIActal*<sup>H40Y</sup> mice, body weight was  
432 measured after 1 month of exposure to the 2% L-tyrosine supplemented diet or to the normal diet.

433

#### 434 **Voluntary running wheel analyses and rotarod assessment of *TgACTAI*<sup>D286G</sup> mice**

435 The daily distance travelled, daily time spent running (summary of 1 min intervals in which at least  
436 one wheel revolution was recorded), average speed and maximum speed values were calculated.  
437 The mean values for all wheel activity traits on days 4, 5 and 6 were used for data analyses. At ~6  
438 weeks of age, male *TgACTAI*<sup>D286G</sup> mice treated from pre-conception were acclimatised to the  
439 rotarod on the day prior to testing by placing mice onto the rotarod at a constant slow speed of 4  
440 rpm for 2 minutes. The following day, mice were tested with placement on the rotarod at 4 rpm,  
441 with the rotarod gradually increased speed over 3 minutes until it reached a maximum value of 60  
442 rpm. The test concluded after the mice had fallen off the rotarod. Each mouse was assessed three

443 times on the same day, being allowed at least 10 minutes to rest in between assessments. The  
444 latency (time to fall from the rod) and the speed of the rotarod when the mice fell off were recorded  
445 for each test. Data were expressed as the averaged value across the three tests.

446

447 **Magnetic resonance (MR) and force output measurement in TgACTA1<sup>D286G</sup> and KIActa1<sup>H40Y</sup>**  
448 **mice**

449 MR investigations of TgACTA1<sup>D286G</sup> male mice treated for 4 weeks from 6 - 7 months of age were  
450 performed in a 4.7-Tesla (T) horizontal superconducting magnet (47/30 Biospec Avance, Bruker,  
451 Ettlingen, Germany) equipped with a Bruker 120 mm BGA12SL (200 mT/m) gradient insert.  
452 Investigations of similarly treated 6 - 7 months of age KIActa1<sup>H40Y</sup> female mice were performed at  
453 11.75 T on a vertical Bruker Avance 500 MHz.89mm<sup>-1</sup> wide-bore imager (Bruker, Ettlingen,  
454 Germany), equipped with high-performance actively shielded gradients (1 T/m maximum gradient  
455 strength, 9 kT.m<sup>-1</sup>.s<sup>-1</sup> maximum slew rate) and interfaced with Paravision 5.1. A transmit/receive  
456 volume RF coil (birdcage, diameter Ø = 3 cm, homogenous length L = 5 cm, Micro 2.5 Probe,  
457 Bruker, Ettlingen, Germany) was used for image acquisition.

458 Mice were anaesthetized and individually placed supine in a home-built cradle specially  
459 designed for the strictly non-invasive functional investigation of the left hindlimb muscles. A home-  
460 built facemask was incorporated into the cradle and was used to maintain prolonged anesthesia  
461 throughout the experiment. The hindlimb was centered inside a <sup>1</sup>H imaging coil and the belly of the  
462 gastrocnemius muscle was located above a <sup>31</sup>P-magnetic resonance spectroscopy (MRS) surface  
463 coil. The foot was positioned on the pedal of the ergometer with a 90° flexion ankle joint. Skeletal  
464 muscle contractions were achieved by transcutaneous electrical stimulation using two rod-shaped  
465 surface electrodes integrated in the cradle and connected to an electrical stimulator (type 215/T;  
466 Hugo Sachs Elektronik-Harvard Apparatus GmbH, March-Hugstetten, Germany). One electrode  
467 was placed at the heel level and the other one was located just above the knee joint. Isometric force  
468 was measured with a home-built ergometer consisting of a foot pedal coupled to a force transducer.  
469 The analog electrical signal from the force transducer was amplified with a home-built amplifier  
470 (Operational amplifier AD620; Analog Devices, Norwood, MA, USA), converted to a digital  
471 signal, monitored and recorded on a personal computer using the Powerlab 35/series system (AD  
472 Instruments, Oxford, United Kingdom).

473 High-resolution MR images (MRI) were acquired at rest to obtain information about  
474 anatomy (i.e. hindlimb muscles volume). For the TgACTA1<sup>D286G</sup> mice ten contiguous axial slices  
475 (thickness = 1 mm), covering the region from the knee to the ankle, were acquired at rest using a  
476 spin echo sequence (echo time (TE) = 18.2 ms; repetition time (TR) = 1000 ms; number of  
477 repetition (NEX) = 2; field of view (FOV) = 30 x 30 mm; matrix size = 256 x 256; acquisition time



478 = 8 min 32 s). For the *KIActa1*<sup>H40Y</sup> mice fifteen contiguous axial slices (thickness = 0.5 mm),  
479 covering the region from the knee to the ankle, were acquired at rest using a gradient echo sequence  
480 (TE = 1.5 ms; TR = 189 ms; NEX = 16; FOV = 20 x 20 mm; matrix size = 128 x 128; acquisition  
481 time = 6 min 27 s). Images were analyzed with FSLview (FMRIB, Oxford, MS). Regions of interest  
482 (ROI) were drawn in the two slices located on the proximal and distal parts of the hindlimb by  
483 manually tracing the border of the anatomic cross sectional area of the whole hindlimb muscles.  
484 Thereafter, the segmentations of the missing intermediate slices were automatically interpolated  
485 (Ogier et al., 2017). The volume of the hindlimb muscles was calculated (mm<sup>3</sup>) as the sum of the  
486 volume of the six consecutive largest slices for the *TgACTA1*<sup>D286G</sup> mice or of the nine consecutive  
487 largest slices for the *KIActa1*<sup>H40Y</sup> mice.

488 For the measurement of force output, non-invasive transcutaneous electrical stimulation was  
489 first elicited with square-wave pulses (0.5 ms duration) on the gastrocnemius muscle of 6-7 month  
490 old mice after 4 weeks of dietary treatment. The individual maximal stimulation intensity was  
491 determined by progressively increasing the stimulus intensity until there was no further peak twitch  
492 force increase. Plantar flexion force was assessed in response to a 100 Hz tetanic stimulation  
493 (duration = 0.75 s) and during a fatigue protocol (80 contractions; 40 Hz; 1.5 s on, 6 s off). The  
494 peak force of each contraction was measured. Regarding the fatigue protocol, the corresponding  
495 tetanic force was averaged every 5 contractions. A fatigue index corresponding to the ratio between  
496 the last five and the first five contractions was determined. The resulting force was divided by the  
497 volume of the corresponding hindlimb muscles (see above) in order to obtain specific force (in  
498 mN.mm<sup>-3</sup>).

499

#### 500 **MRS evaluation and metabolic analyses of skeletal muscles from *TgACTA1*<sup>D286G</sup> and** 501 ***KIActa1*<sup>H40Y</sup> mice**

502 Metabolic changes were investigated using <sup>31</sup>P-MRS at rest and during the fatiguing protocol.  
503 Spectra from the gastrocnemius region were continuously acquired at rest and throughout the  
504 fatigue protocol. A total of 497 free induction decays (FID) were acquired (TR = 2 s). Data were  
505 processed using a proprietary software developed using IDL (Interactive Data Language, Research  
506 System, Inc., Boulder, CO, USA). The first 180 FID were acquired at rest and summed together.  
507 The next 317 FID were acquired during the stimulation period and summed together. Relative  
508 concentrations of high-energy phosphate metabolites (phosphocreatine (PCr), inorganic phosphate  
509 (Pi) and ATP) were obtained by a time-domain fitting routine using the AMARES-MRUI Fortran  
510 code and appropriate prior knowledge of the ATP multiplets. Intracellular pH (pH) was calculated  
511 from the chemical shift of the Pi signal relative to PCr (Moon and Richards, 1973).

512



## 513 **Statistics**

514 Statistical analyses for experiments in *TgACTA1<sup>D286G</sup>* mice and zebrafish were performed using  
515 GraphPad Prism 7. All phenotypic traits measured were tested using a nonparametric *t*-test (Mann-  
516 Whitney) or a two-way ANOVA. Unequal variances were assumed and all data were tested for  
517 normal distribution and passed using D'Agostino and Perron's test for Gaussian distribution. All  
518 reported sample sizes were powered to detect statistically significant differences in all parameters  
519 measured.

520 Statistical analyses for experiments with 6-7 month-old *TgACTA1<sup>D286G</sup>* and *KIActa1<sup>H40Y</sup>*  
521 mice were performed with the Statistica software version 9 (StatSoft, Tulsa, OK, USA). Normality  
522 was checked using a Kolmogorov-Smirnov test. Two-factor (group x contraction number) analysis  
523 of variance (ANOVA) with repeated measures on contraction number were used to compare force  
524 production. When a main effect or a significant interaction was found, Tukey's HSD *post-hoc*  
525 analysis was used. One-way ANOVA was used to compare PCr consumption, Pi production and  
526 pH<sub>i</sub>. Unpaired *t*-tests were used for body weight, skeletal muscles volume, fatigue index and  
527 maximal force comparison. For all mice data shown, values are presented as the mean±standard  
528 deviation, with the mean±standard error being reported for all data collected in zebrafish.

529

## 530 **Acknowledgements**

531 We thank the staff at the Animal Resources Centre. Some analysis for this study was performed by  
532 the Centre for Microscopy, Characterisation and Analysis (Metabolomics Australia) and was  
533 supported by infrastructure funding from the Western Australian State Government in partnership  
534 with the Australian Federal Government, through the National Collaborative Research  
535 Infrastructure Strategy (NCRIS).

536

## 537 **Funding**

538 This study was funded by the Association Française contre les Myopathies (trampoline grant  
539 #18207, JG), and by the Auism Foundation (NL). KN was supported by an Australian Research  
540 Council Future Fellowship (FT100100734), NL a National Health and Medical Research Council  
541 (NHMRC) Principal Research Fellowship (APP1002147), AM an Australian Postgraduate Award,  
542 and TS an MDA Development Grant (APP381325) and an AFM Postdoctoral Fellowship  
543 (APP19853). The creation of the *TgACTA1<sup>D286G</sup>-eGFP* zebrafish model was supported by NHMRC  
544 project grant APP1010110.

545

## 546 **References**

- 547 **Bachmanov, A. A., Reed, D. R., Beauchamp, G. K. and Tordoff, M. G.** (2002). Food  
548 intake, water intake, and drinking spout side preference of 28 mouse strains. *Behav Genet* **32**, 435-  
549 43.
- 550 **Banderet, L. E. and Lieberman, H. R.** (1989). Treatment with tyrosine, a neurotransmitter  
551 precursor, reduces environmental stress in humans. *Brain Res Bull* **22**, 759-62.
- 552 **Brady, K., Brown, J. W. and Thurmond, J. B.** (1980). Behavioral and neurochemical  
553 effects of dietary tyrosine in young and aged mice following cold-swim stress. *Pharmacol Biochem*  
554 *Behav* **12**, 667-74.
- 555 **Boctor, A. M. and Harper, A. E.** (1968). Tyrosine toxicity in the rat: effect of high intake  
556 of p-hydroxyphenylpyruvic acid and of force-feeding high tyrosine diet. *J Nutr* **95**, 535-40.
- 557 **Deijen, J. B., Wientjes, C. J., Vullingsh, H. F., Cloin, P. A. and Langefeld, J. J.** (1999).  
558 Tyrosine improves cognitive performance and reduces blood pressure in cadets after one week of a  
559 combat training course. *Brain Res Bull* **48**, 203-9.
- 560 **Fernstrom, M. H. and Fernstrom, J. D.** (1995). Effect of chronic protein ingestion on rat  
561 central nervous system tyrosine levels and in vivo tyrosine hydroxylation rate. *Brain Res* **672**, 97-  
562 103.
- 563 **Hamasu, K., Haraguchi, T., Kabuki, Y., Adachi, N., Tomonaga, S., Sato, H., Denbow,**  
564 **D. M. and Furuse, M.** (2009). L-proline is a sedative regulator of acute stress in the brain of  
565 neonatal chicks. *Amino Acids* **37**, 377-82.
- 566 **Jansson, T.** (2001). Amino acid transporters in the human placenta. *Pediatr Res* **49**, 141-7.
- 567 **Kabuki, Y., Mizobe, Y., Yamada, S. and Furuse, M.** (2009). Dietary l-tyrosine alleviates  
568 the behavioral alterations induced by social isolation stress in mice. *Brain Res Bull* **80**, 389-96.
- 569 **Kalita, D.** (1989). A new treatment for congenital nonprogressive nemaline myopathy.  
570 *Journal of Orthomolecular Medicine* **4**, 5.
- 571 **Lehnert, H., Reinstein, D. K., Strowbridge, B. W. and Wurtman, R. J.** (1984).  
572 Neurochemical and behavioral consequences of acute, uncontrollable stress: effects of dietary  
573 tyrosine. *Brain Res* **303**, 215-23.
- 574 **Luckose, F., Pandey, M. C. and Radhakrishna, K.** (2015). Effects of amino acid  
575 derivatives on physical, mental, and physiological activities. *Crit Rev Food Sci Nutr* **55**, 1793-807.
- 576 **Malfatti, E., Bohm, J., Lacene, E., Beuvin, M., Romero, N. B. and Laporte, J.** (2015). A  
577 Premature Stop Codon in MYO18B is Associated with Severe Nemaline Myopathy with  
578 Cardiomyopathy. *J Neuromuscul Dis* **2**, 219-227.
- 579 **Miyatake, S., Mitsuhashi, S., Hayashi, Y. K., Purevjav, E., Nishikawa, A., Koshimizu,**  
580 **E., Suzuki, M., Yatabe, K., Tanaka, Y., Ogata, K. et al.** (2017). Biallelic Mutations in MYPN,

- 581 Encoding Myopalladin, Are Associated with Childhood-Onset, Slowly Progressive Nemaline  
582 Myopathy. *Am J Hum Genet* **100**, 169-178.
- 583 **Moon, R. B. and Richards, J. H.** (1973). Determination of intracellular pH by 31P  
584 magnetic resonance. *J Biol Chem* **248**, 7276-8.
- 585 **MRC Vitamin Study Research Group.** (1991). Prevention of neural tube effects: Results  
586 of the Medical Research Council Vitamin Study. *Lancet* **338**, 131-137.
- 587 **National Research Council (US) Committee for the Update of the Guide for the Care  
588 and Use of Laboratory Animals** (2011). Guide for the Care and Use of Laboratory Animals.  
589 Washington (USA): National Academies Press.
- 590 **Nguyen, M. A., Joya, J. E., Kee, A. J., Domazetovska, A., Yang, N., Hook, J. W.,  
591 Lemckert, F. A., Kettle, E., Valova, V. A., Robinson, P. J. et al.** (2011). Hypertrophy and dietary  
592 tyrosine ameliorate the phenotypes of a mouse model of severe nemaline myopathy. *Brain* **134**,  
593 3516-29.
- 594 **Nowak, K. J., Davis, M. R., Wallgren-Pettersson, C., Lamont, P. J. and Laing, N. G.**  
595 (2015). Clinical utility gene card for: Nemaline myopathy - update 2015. *Eur J Hum Genet* **23**.
- 596 **Nowak, K. J., Ravenscroft, G. and Laing, N. G.** (2013). Skeletal muscle alpha-actin  
597 diseases (actinopathies): pathology and mechanisms. *Acta Neuropathol* **125**, 19-32.
- 598 **Ogier, A., Sdika, M., Fouré, A., Le Troter, A. and Bendahan, D.** (2017). Individual  
599 muscle segmentation in MR Images: a 3D propagation through 2D non-linear registration  
600 approaches. In *39th Annual International Conference of the IEEE Engineering in Medicine and  
601 Biology Society*. Jeju Island, Korea.
- 602 **Olukman, O., Calkavur, S., Diniz, G., Unalp, A. and Atlihan, F.** (2013). Nemaline  
603 myopathy in a newborn infant: a rare muscle disorder. *Neurol Neurochir Pol* **47**, 493-8.
- 604 **Rassin, D. K., Sturman, J. A. and Gull, G. E.** (1978). Taurine and other free amino acids  
605 in milk of man and other mammals. *Early Hum Dev* **2**, 1-13.
- 606 **Ravenscroft, G., Jackaman, C., Bringans, S., Papadimitriou, J. M., Griffiths, L. M.,  
607 McNamara, E., Bakker, A. J., Davies, K. E., Laing, N. G. and Nowak, K. J.** (2011). Mouse  
608 models of dominant ACTA1 disease recapitulate human disease and provide insight into therapies.  
609 *Brain* **134**, 1101-15.
- 610 **Ryan, M. M., Sy, C., Rudge, S., Ellaway, C., Ketteridge, D., Roddick, L. G.,  
611 Iannaccone, S. T., Kornberg, A. J. and North, K. N.** (2008). Dietary L-tyrosine supplementation  
612 in nemaline myopathy. *J Child Neurol* **23**, 609-13.
- 613 **Shy, G. M., Engel, W. K., Somers, J. E. and Wanko, T.** (1963). Nemaline Myopathy. A  
614 New Congenital Myopathy. *Brain* **86**, 793-810.

615 **Sztal, T. E., Ruparelia, A. A., Williams, C. and Bryson-Richardson, R. J.** (2016). Using  
616 Touch-evoked Response and Locomotion Assays to Assess Muscle Performance and Function in  
617 Zebrafish. *J Vis Exp*.

618 **Sztal, T. E., Zhao, M., Williams, C., Oorschot, V., Parslow, A. C., Giousoh, A., Yuen,  
619 M., Hall, T. E., Costin, A., Ramm, G. et al.** (2015). Zebrafish models for nemaline myopathy  
620 reveal a spectrum of nemaline bodies contributing to reduced muscle function. *Acta Neuropathol*  
621 **130**, 389-406.

622 **Thurmond, J. B. and Brown, J. W.** (1984). Effect of brain monoamine precursors on  
623 stress-induced behavioral and neurochemical changes in aged mice. *Brain Res* **296**, 93-102.

624 **Wallgren-Pettersson, C. and Laing, N. G.** (2003). 109th ENMC International Workshop:  
625 5th workshop on nemaline myopathy, 11th-13th October 2002, Naarden, The Netherlands.  
626 *Neuromuscul Disord* **13**, 501-7.

627 **Westerfield, M.** (2007). *The Zebrafish Book. A Guide for the Laboratory Use of Zebrafish*  
628 (Danio rerio). USA.

629

## 630 **Figure legends**

### 631 **Fig. 1. Toxicity analyses for L-tyrosine treatment of wildtype zebrafish.**

632 (A) Percentage survival, and (B) resting heart rate in beats per minute (bpm) of zebrafish treated  
633 with increasing L-tyrosine concentrations (from 0.1  $\mu$ M to 10 mM) or H<sub>2</sub>O (used as a control).  
634 Error bars represent  $\pm$ s.e.m. for four independent experiments with 30 zebrafish per experiment for  
635 survival assays and 10 zebrafish per experiment for heart rate assays, \* $p$ <0.05, \*\* $p$ <0.01 compared  
636 to H<sub>2</sub>O treatment. (C) Normalised distance travelled by 6 dpf zebrafish treated with increasing L-  
637 tyrosine concentrations (from 0.1  $\mu$ M to 1 mM) or H<sub>2</sub>O. Error bars represent  $\pm$ s.e.m. for four  
638 independent experiments with 19-24 zebrafish per dose per experiment. \*\* $p$  <0.01.

639

### 640 **Fig. 2. L-tyrosine treatment of ACTA1<sup>D286G</sup> zebrafish.**

641 Normalised distance travelled by 6 dpf TgACTA1<sup>D286G</sup>-*eGFP* and wildtype sibling control zebrafish  
642 treated with 10  $\mu$ M L-tyrosine or H<sub>2</sub>O. Error bars represent  $\pm$ s.e.m for five independent experiments  
643 with n=238 for TgACTA1<sup>D286G</sup>-*eGFP*, n=168 wildtype siblings 16-39 zebrafish per treatment, per  
644 genotype, per experiment. \* $p$  <0.05, \*\* $p$  <0.01.

645

646 **Fig. 3. Levels of free L-tyrosine in sera and quadriceps femoris of *TgACTAI*<sup>D286G</sup> mice.**

647 The concentration of free L-tyrosine was quantified via LC/MS in (A) sera samples (untreated, n=4;  
648 L-tyrosine, n=8), and (B) quadriceps femoris muscles (untreated, n=6; L-tyrosine, n=11) of 6-week  
649 old *TgACTAI*<sup>D286G</sup> mice receiving a 2% L-tyrosine supplemented diet from preconception  
650 compared to those fed control diets. Each data point represents an individual mouse  $\pm$ s.d. \**p* <0.05,  
651 \*\**p* <0.01.

652

653 **Fig. 4. Total body mass and hindlimb muscles volume for NM mice treated with a 2 % L-**  
654 **tyrosine supplemented diet.**

655 Total body mass was determined in 6-week old *TgACTAI*<sup>D286G</sup> mice (A) (untreated = 10 males, 12  
656 females; L-tyrosine = 14 males, 17 females) receiving a 2 % L-tyrosine supplemented diet or an  
657 untreated diet, as well as C57BL/6J mice (untreated=10 males, 5 females). (B) Total body mass of  
658 6–7 month old mice. *TgACTAI*<sup>D286G</sup> (untreated=9 males, L-tyrosine=8 males.); *KIActaI*<sup>H40Y</sup>  
659 (untreated=13 females, L-tyrosine=13 females.). (C) Hindlimb muscles volume for mice: male 6–7  
660 month old *TgACTAI*<sup>D286G</sup> (untreated=8; L-tyrosine=7), female *KIActaI*<sup>H40Y</sup> (untreated=13; L-  
661 tyrosine=13). Each data point represents an individual mouse  $\pm$ s.d. \**p* <0.05, \*\*\**p* <0.001.

662

663 **Fig. 5. Voluntary running wheel activity in 6-week old *TgACTAI*<sup>D286G</sup> mice receiving a 2% L-**  
664 **tyrosine supplemented diet from preconception compared to *TgACTAI*<sup>D286G</sup> and WT**  
665 **C57BL/6J mice fed an untreated diet.**

666 Parameters of voluntary running wheel performance measured included (A) maximum speed  
667 (m/min<sup>3</sup>), (B) distance travelled (km/d), (C) average speed (m/min), and (D) duration spent running  
668 (min/d). Untreated *TgACTAI*<sup>D286G</sup> mice (10 males, 12 females), L-tyrosine treated *TgACTAI*<sup>D286G</sup>  
669 mice (14 males, 17 females), untreated WT C57BL/6J mice (15 males, 10 females). Each data  
670 point represents an individual mouse average calculated over days 4, 5, and 6 of voluntary wheel  
671 access  $\pm$ s.d. \**p* <0.05, \*\**p* <0.01, \*\*\**p* <0.001.

672

673 **Fig. 6. Accelerated rotarod performance in *TgACTAI*<sup>D286G</sup> and C57BL/6J male mice.**

674 Performance on an accelerated rotarod apparatus was determined in 6-week old *TgACTAI*<sup>D286G</sup>  
675 male mice receiving a 2% L-tyrosine supplemented diet (n=14) compared to *TgACTAI*<sup>D286G</sup> (n=9)

676 and C57BL/6J (n=10) mice fed on untreated diets. (A) Average speed at fall (rpm), and (B) latency  
677 to fall (s). Each data point represents the average of 3 attempts by an individual mouse  $\pm$ s.d. \*\*\*\* $p$   
678 <0.0001.  
679

680 **Fig. 7. *In vivo* gastrocnemius skeletal muscle performance of TgACTAI<sup>D286G</sup> and KIActal<sup>H40Y</sup>**  
681 **mice.**

682 Absolute maximal force production (A) & (B) and force production during the stimulation protocol  
683 (C) & (D) from 6-7 month old TgACTAI<sup>D286G</sup> (B) & (D) and KIActal<sup>H40Y</sup> (A) & (C) mice fed  
684 either an untreated diet or a diet supplemented with 2% L-tyrosine for one month. TgACTAI<sup>D286G</sup>  
685 (untreated=8 males, L-tyrosine=7 males,); KIActal<sup>H40Y</sup> (untreated=13 females, L-tyrosine=13  
686 females). For (A) & (B) each data point represents an individual mouse  $\pm$ s.d. Data points for parts  
687 (C) & (D) are represented by the mean force for 5 contractions of all mice in each diet group  $\pm$ s.d.  
688 \*\*\* $p$  <0.001 (significantly different from first five contractions), which demonstrates the effect of  
689 time on muscle force performance during exercise.

690  
691

692 **Fig. 8. Changes in gastrocnemius PCr and pH during the exercise stimulation in**  
693 **TgACTAI<sup>D286G</sup> and KIActal<sup>H40Y</sup> mice.**

694 [PCr] (A) & (B) and pH (C) & (D) for hindlimb skeletal muscles from 6-7 month old  
695 TgACTAI<sup>D286G</sup> (B) & (D) and KIActal<sup>H40Y</sup> (A) & (C) mice fed either an untreated diet or  
696 supplemented with a 2% L-tyrosine diet, at rest versus at the end of the exercise stimulation  
697 protocol. The [PCr] and pH values significantly differed between rest and exercised states for each  
698 strain, however there was no significant difference detected due to L-tyrosine treatment.  
699 TgACTAI<sup>D286G</sup> (untreated=8 males, L-tyrosine=7 males); KIActal<sup>H40Y</sup> (untreated=13 females, L-  
700 tyrosine=13 females). Each data point represents an individual mouse value expressed as mean  $\pm$ s.d.  
701 \*\*\* $p$  <0.001.

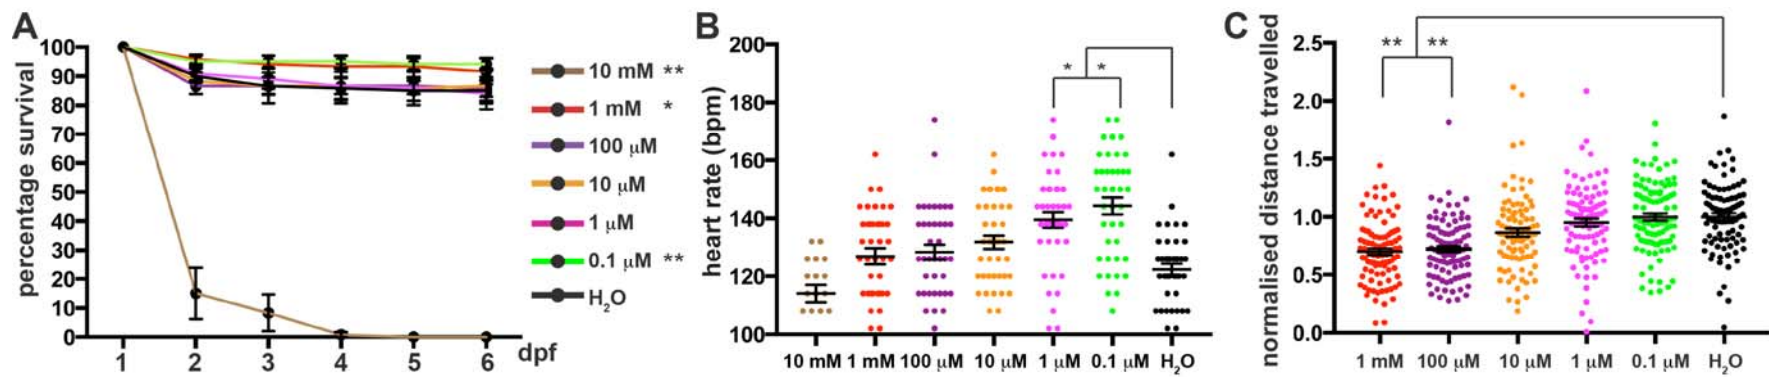

**Fig. 1. Toxicity analyses for L-tyrosine treatment of wildtype zebrafish.**

(A) Percentage survival, and (B) resting heart rate in beats per minute (bpm) of zebrafish treated with increasing L-tyrosine concentrations (from 0.1  $\mu$ M to 10 mM) or H<sub>2</sub>O (used as a control). Error bars represent  $\pm$ s.e.m. for four independent experiments with 30 zebrafish per experiment for survival assays and 10 zebrafish per experiment for heart rate assays, \* $p$ <0.05, \*\* $p$ <0.01 compared to H<sub>2</sub>O treatment. (C) Normalised distance travelled by 6 dpf zebrafish treated with increasing L-tyrosine concentrations (from 0.1  $\mu$ M to 1 mM) or H<sub>2</sub>O. Error bars represent  $\pm$ s.e.m. for four independent experiments with 19-24 zebrafish per dose per experiment. \*\* $p$ <0.01.



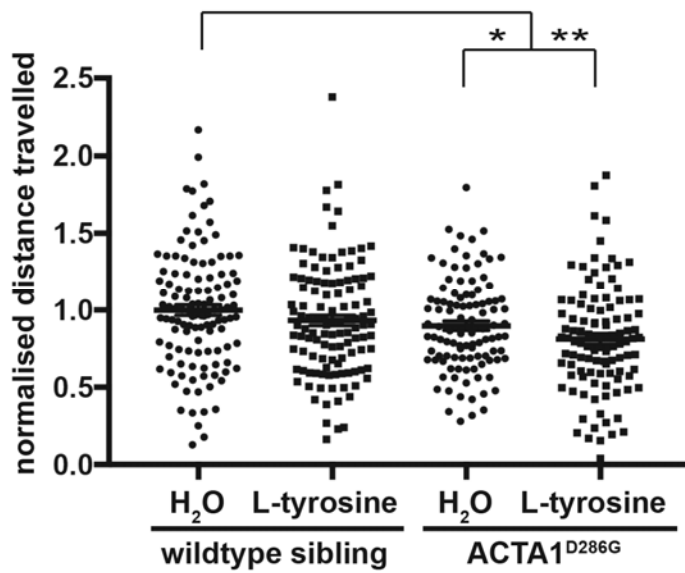

**Fig. 2. L-tyrosine treatment of  $ACTA1^{D286G}$  zebrafish.**

Normalised distance travelled by 6 dpf  $TgACTA1^{D286G}-eGFP$  and wildtype sibling control zebrafish treated with 10  $\mu$ M L-tyrosine or H<sub>2</sub>O. Error bars represent  $\pm$ s.e.m for five independent experiments with n=238 for  $TgACTA1^{D286G}-eGFP$  zebrafish, and n=168 wildtype siblings. Each experiment had 16-35 zebrafish per treatment, per genotype. \*p<0.05, \*\*p<0.01.

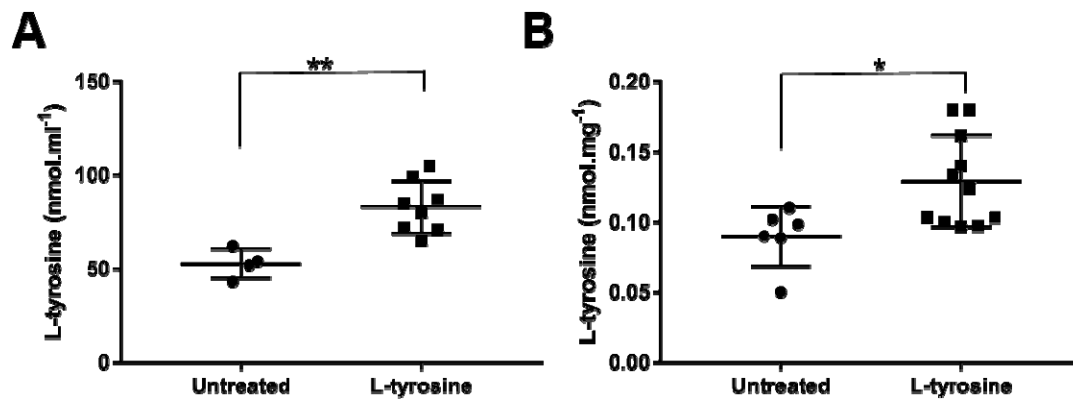

**Fig. 3. Levels of free L-tyrosine in sera and quadriceps femoris of *TgACTAI*<sup>D286G</sup> mice.**

The concentration of free L-tyrosine was quantified via LC/MS in (A) sera samples (untreated, n=4; L-tyrosine, n=8), and (B) quadriceps femoris muscles (untreated, n=6; L-tyrosine, n=11) of 6-week old *TgACTAI*<sup>D286G</sup> mice receiving a 2% L-tyrosine supplemented diet from preconception compared to those fed control diets. Each data point represents an individual mouse  $\pm$ s.d. \*p<0.05, \*\*p<0.01.

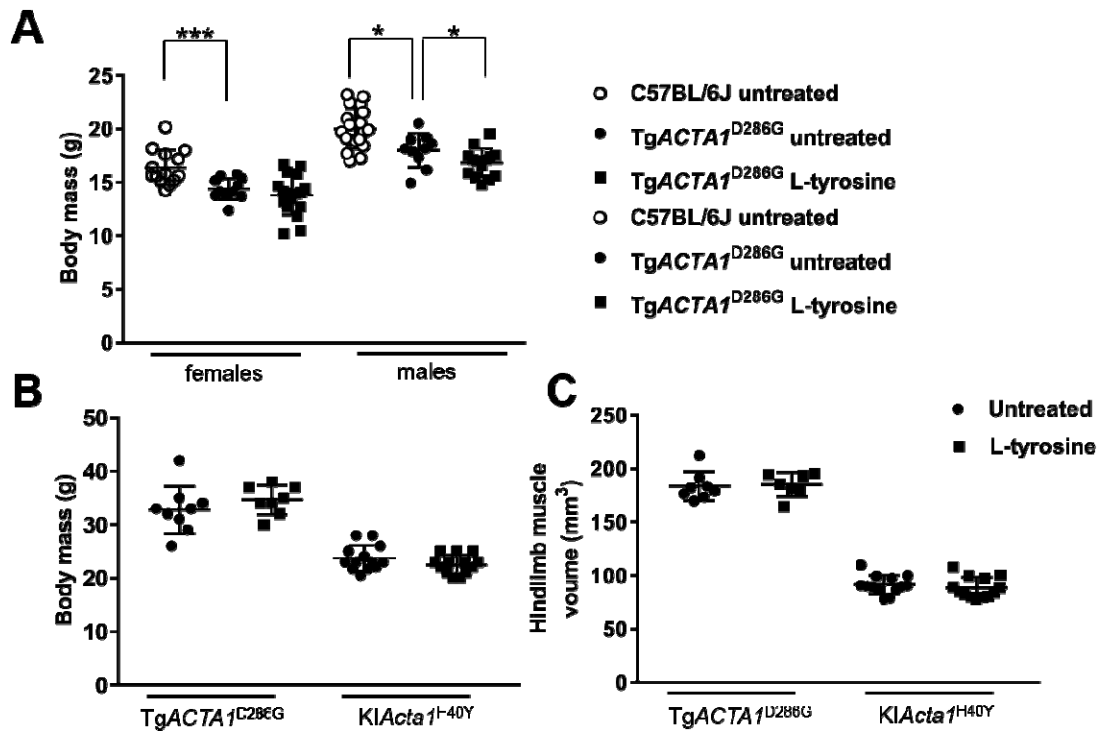

**Fig. 4. Total body mass and hindlimb muscles volume for NM mice treated with a 2 % L-tyrosine supplemented diet.**

Total body mass was determined in 6-week old TgACTA1<sup>D286G</sup> mice (A) (untreated = 10 males, 12 females; L-tyrosine=14 males, 17 females) receiving a 2 % L-tyrosine supplemented diet or an untreated diet, as well as C57BL/6J mice (untreated=10 males, 5 females). (B) Total body mass of 6–7 month old mice. TgACTA1<sup>D286G</sup> (untreated=9 males, L-tyrosine=8 males,); KIActa1<sup>H40Y</sup> (untreated=13 females, L-tyrosine=13 females,). (C) Hindlimb muscle volume for mice: male 6–7 month old TgACTA1<sup>D286G</sup> (untreated=8; L-tyrosine=7), female KIActa1<sup>H40Y</sup> (untreated=13; L-tyrosine=13). Each data point represents an individual mouse  $\pm$ s.d. \*p<0.05, \*\*\*p<0.001.

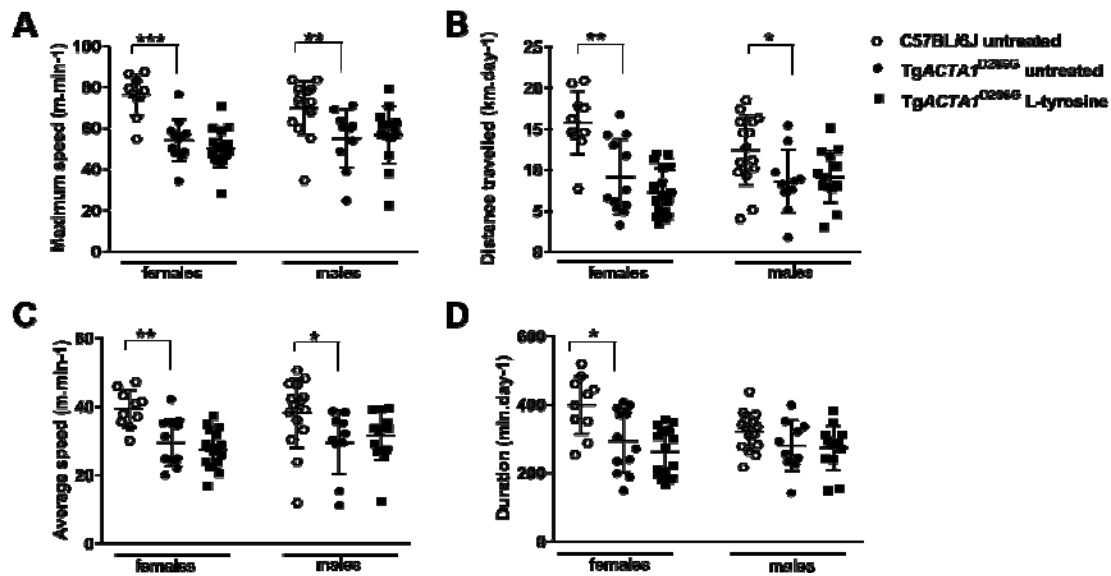

**Fig. 5. Voluntary running wheel activity in 6-week old *TgACTA1*<sup>D286G</sup> mice receiving a 2% L-tyrosine supplemented diet from preconception compared to *TgACTA1*<sup>D286G</sup> and WT C57BL/6J mice fed an untreated diet.**

Parameters of voluntary running wheel performance measured included (A) Maximum speed (m.min<sup>-1</sup>), (B) distance travelled (km.day<sup>-1</sup>), (C) average speed (m.min<sup>-1</sup>), and (D) duration spent running (min.day<sup>-1</sup>). Untreated *TgACTA1*<sup>D286G</sup> mice (10 males, 12 females), L-tyrosine treated *TgACTA1*<sup>D286G</sup> mice (14 males, 17 females), untreated WT C57BL/6J mice (15 males, 10 females). Each data point represents an individual mouse average calculated over days 4, 5, and 6 of voluntary wheel access  $\pm$ s.d. \*p<0.05, \*\*p<0.01, \*\*\*p<0.001.

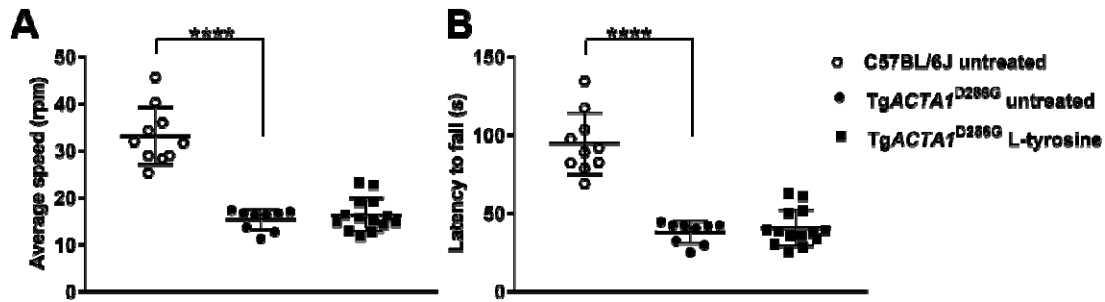

**Fig. 6. Accelerated rotarod performance in TgACTA1<sup>D286G</sup> and C57BL/6J male mice.**

Performance on an accelerated rotarod apparatus was determined in 6-week old TgACTA1<sup>D286G</sup> male mice receiving a 2% L-tyrosine supplemented diet (n=14) compared to TgACTA1<sup>D286G</sup> (n=9) and C57BL/6J (n=10) mice fed on untreated diets. (A) Average speed at fall (rpm), and (B) latency to fall (s). Each data point represents the average of 3 attempts by an individual mouse  $\pm$ s.d. \*\*\*\*p<0.0001.

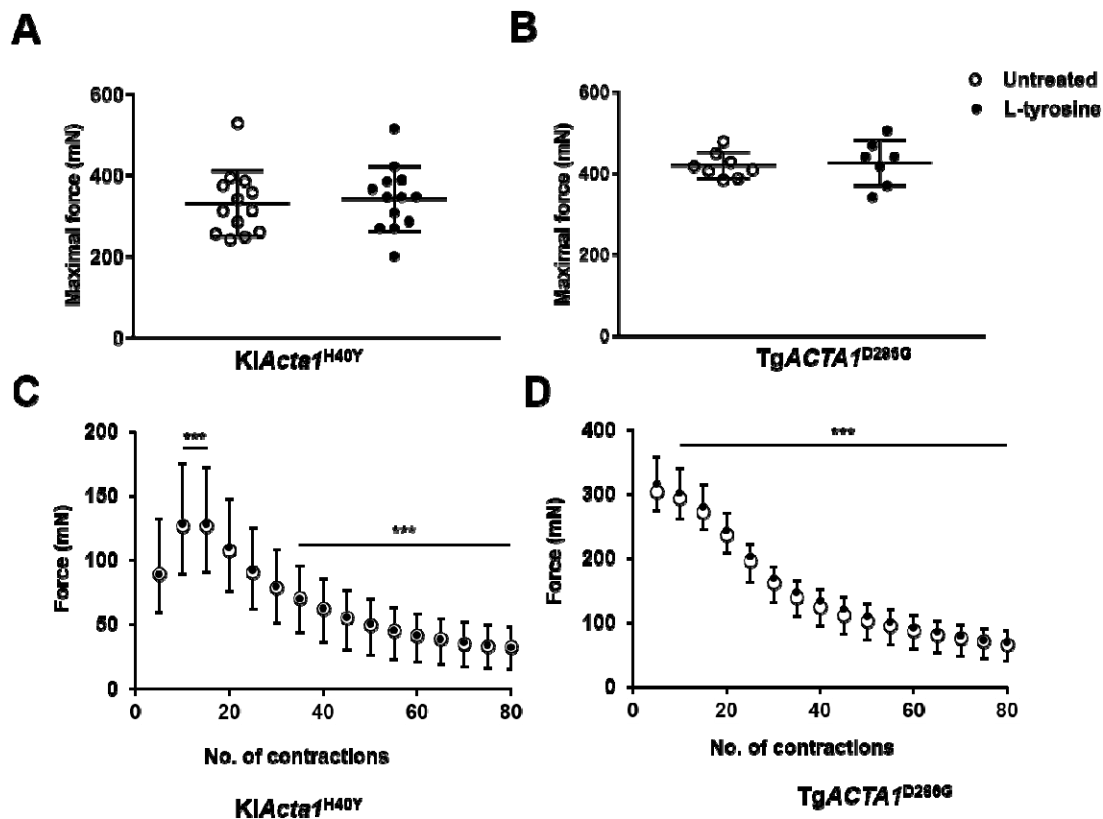

**Fig. 7. *In vivo* gastrocnemius skeletal muscle performance of *TgACTA1<sup>D286G</sup>* and *KIActa1<sup>H40Y</sup>* mice.**

Absolute maximal force production (A) & (B) and force production during the stimulation protocol (C) & (D) from 6-7 month old *TgACTA1<sup>D286G</sup>* (B) & (D) and *KIActa1<sup>H40Y</sup>* (A) & (C) mice fed either an untreated diet or a diet supplemented with 2% L-tyrosine for one month. *TgACTA1<sup>D286G</sup>* (untreated=8 males, L-tyrosine=7 males,); *KIActa1<sup>H40Y</sup>* (untreated=13 females, L-tyrosine=13 females). For (A) & (B) each data point represents an individual mouse  $\pm$ s.d. Data points for parts (C) & (D) are represented by the mean force for 5 contractions of all mice in each diet group  $\pm$ s.d. \*\*\* $p$ <0.001 (significantly different from first five contractions), which demonstrates the effect of time on muscle force performance during exercise.

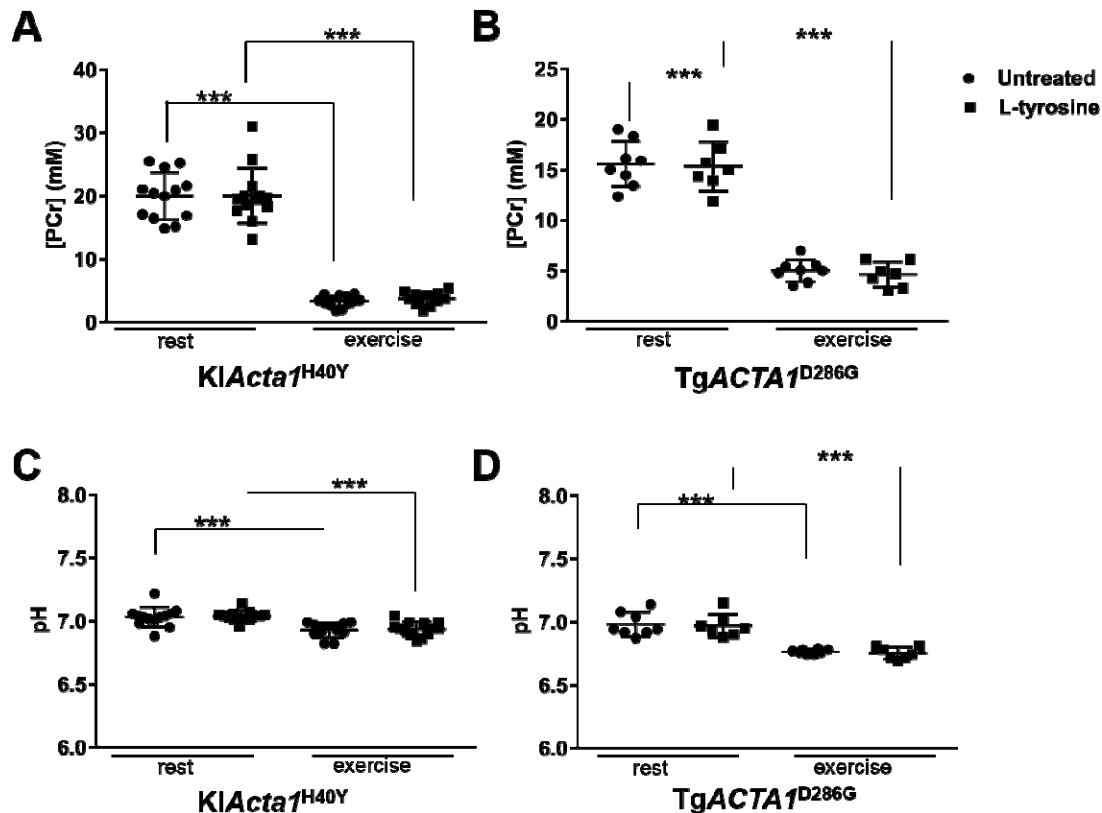

**Fig. 8. Changes in gastrocnemius PCr and pH during the exercise stimulation in *TgACTA1<sup>D286G</sup>* and *KIActa1<sup>H40Y</sup>* mice.**

[PCr] (A) & (B) and pH (C) & (D) for hindlimb skeletal muscles from 6-7 month old *TgACTA1<sup>D286G</sup>* (B) & (D) and *KIActa1<sup>H40Y</sup>* (A) & (C) mice fed either an untreated diet or supplemented with a 2% L-tyrosine diet, at rest versus at the end of the exercise stimulation protocol. The [PCr] and pH values significantly differed between rest and exercised states for each strain, however there was no significant difference detected due to L-tyrosine treatment. *TgACTA1<sup>D286G</sup>* (untreated=8 males, L-tyrosine=7 males); *KIActa1<sup>H40Y</sup>* (untreated=13 females, L-tyrosine=13 females). Each data point represents an individual mouse value expressed as mean  $\pm$  s.d. \*\*\*p<0.001.
